# Supplementary material
Source: MDPI journal article supplement (https://www.mdpi.com/search?q=molbank-2023-M1560)
Supplement: s002 [file molbank-2023-M1560-s002-mod.mol]

KingDraw KingDraw.mol
  corina  01192312003D 1   1.00000     0.00000 
CORINA 4.4.0 0026  12.08.2021
 13 13  0  0  0  0  0  0  0  0999 V2000
    0.1399    4.1642    0.0316 S   0  0  0  0  0  0  0  0  0  0  0  0
   -0.6647    5.5014    0.0351 N   0  0  0  0  0  0  0  0  0  0  0  0
   -1.2073    3.0974    0.0246 C   0  0  0  0  0  0  0  0  0  0  0  0
   -2.3255    3.9345    0.0345 C   0  0  0  0  0  0  0  0  0  0  0  0
   -4.3677    3.2598   -1.1276 O   0  0  0  0  0  0  0  0  0  0  0  0
   -3.7236    3.4667    0.0378 C   0  0  0  0  0  0  0  0  0  0  0  0
   -4.2951    3.2676    1.0914 O   0  0  0  0  0  0  0  0  0  0  0  0
   -5.7424    2.7992   -1.0483 C   0  0  0  0  0  0  0  0  0  0  0  0
   -1.9378    5.2709    0.0399 C   0  0  0  0  0  0  0  0  0  0  0  0
   -3.2042    6.6752    0.0529 Br  0  0  0  0  0  0  0  0  0  0  0  0
   -0.0111    0.9658    0.0074 N   0  0  0  0  0  0  0  0  0  0  0  0
   -1.1873    1.6238    0.0165 C   0  0  0  0  0  0  0  0  0  0  0  0
   -2.2320    1.0016    0.0181 O   0  0  0  0  0  0  0  0  0  0  0  0
  2  1  1  0
  1  3  1  0
  4  9  1  0
  3  4  2  0
  9  2  2  0
  3 12  1  0
  4  6  1  0
  6  5  1  0
  6  7  2  0
  5  8  1  0
  9 10  1  0
 12 11  1  0
 12 13  2  0
M  END
$$$$
