# Supplementary material
Source: MDPI journal article supplement (https://www.mdpi.com/search?q=molbank-2023-M1560)
Supplement: s002 [file molbank-2023-M1560-s002.mol]

KingDraw KingDraw.mol
KingDraw2D

 13 13  0  0  0  0  0  0  0  0999 V2000
    5.7943   -4.8835    0.0000 S   0  0  0  0  0  0  0  0  0  0  0  0
    6.4254   -4.4250    0.0000 N   0  0  0  0  0  0  0  0  0  0  0  0
    5.1633   -4.4250    0.0000 C   0  0  0  0  0  0  0  0  0  0  0  0
    5.4043   -3.6832    0.0000 C   0  0  0  0  0  0  0  0  0  0  0  0
    4.1701   -3.1338    0.0000 O   0  0  0  0  0  0  0  0  0  0  0  0
    4.9458   -3.0522    0.0000 C   0  0  0  0  0  0  0  0  0  0  0  0
    5.2627   -2.3395    0.0000 O   0  0  0  0  0  0  0  0  0  0  0  0
    3.7115   -2.5028    0.0000 C   0  0  0  0  0  0  0  0  0  0  0  0
    6.1843   -3.6832    0.0000 C   0  0  0  0  0  0  0  0  0  0  0  0
    6.6427   -3.0521    0.0000 Br  0  0  0  0  0  0  0  0  0  0  0  0
    3.8418   -4.1443    0.0000 N   0  0  0  0  0  0  0  0  0  0  0  0
    4.4215   -4.6661    0.0000 C   0  0  0  0  0  0  0  0  0  0  0  0
    4.2597   -5.4292    0.0000 O   0  0  0  0  0  0  0  0  0  0  0  0
  2  1  1  0
  1  3  1  0
  4  9  1  0
  3  4  2  0
  9  2  2  0
  3 12  1  0
  4  6  1  0
  6  5  1  0
  6  7  2  0
  5  8  1  0
  9 10  1  0
 12 11  1  0
 12 13  2  0
M  END
